# Supplementary material
Source: ML conference proceedings conference paper supplement (https://openreview.net/forum?id=DHkGKg2fJay)
Supplement: supplementary_material [file attachment]

# LEVERAGED WEIGHTED LOSS FOR PARTIAL LABEL LEARNING

**Anonymous authors**

Paper under double-blind review

## 1 PROOFS

We present all proofs for Section 2 here. For the sake of conciseness and readability, we denote  $\mathcal{Y}^y$  as the collection of all partial label sets containing the true label  $y$ , i.e.  $\mathcal{Y}^y := \{\mathbf{y} \in \mathcal{Y} | y \in \mathbf{y}\}$ .

**Proof 1 (of Lemma 1)** When Assumption 3 holds, elementary probability theory states that

$$\begin{aligned} P(\mathbf{Y} = \mathbf{y} | Y = y, X = x) &= \prod_{s \in \mathbf{y}} q_s \cdot \prod_{t \notin \mathbf{y}} (1 - q_t) \\ &= q_y \prod_{s \in \mathbf{y}, s \neq y} q_s \cdot \prod_{t \notin \mathbf{y}} (1 - q_t). \end{aligned}$$

By Assumption 1, we have  $q_z = 1$ , and thus complete the proof.

**Proof 2 (of Theorem 1)** For any  $x \in \mathcal{X}$ , there holds

$$\begin{aligned} \bar{\mathcal{R}}(\bar{\mathcal{L}}, g(X)) &= \mathbb{E}_{\mathbf{Y}|X}[\bar{\mathcal{L}}(\mathbf{Y}, g(x)) | X = x] \\ &= \sum_{\mathbf{y} \in 2^{[K]}} \bar{\mathcal{L}}(\mathbf{y}, g(x)) P(\mathbf{Y} = \mathbf{y} | X = x) \\ &= \sum_{\mathbf{y} \in 2^{[K]}} \bar{\mathcal{L}}(\mathbf{y}, g(x)) \sum_{y \in \mathbf{y}} P(\mathbf{Y} = \mathbf{y}, Y = y | X = x) \\ &= \sum_{\mathbf{y} \in 2^{[K]}} \bar{\mathcal{L}}(\mathbf{y}, g(x)) \sum_{y \in \mathbf{y}} P(\mathbf{Y} = \mathbf{y} | Y = y, X = x) P(Y = y | X = x) \\ &= \sum_{y=1}^K \sum_{\mathbf{y} \in 2^{[K]}} P(\mathbf{Y} = \mathbf{y} | Y = y, X = x) \bar{\mathcal{L}}(\mathbf{y}, g(x)) P(Y = y | X = x), \end{aligned}$$

and

$$\mathcal{R}(\mathcal{L}, g(X)) = \mathbb{E}_{Y|X}[\mathcal{L}(Y, g(x)) | X = x] = \sum_{y=1}^K \mathcal{L}(y, g(x)) P(Y = y | X = x).$$

Therefore, if we have

$$\begin{aligned} \mathcal{L}(y, g(x)) &= \sum_{\mathbf{y} \in 2^{[K]}} P(\mathbf{Y} = \mathbf{y} | Y = y, X = x) \bar{\mathcal{L}}(\mathbf{y}, g(x)) \\ &= \sum_{\mathbf{y} \in \mathcal{Y}^y} P(\mathbf{Y} = \mathbf{y} | Y = y, X = x) \bar{\mathcal{L}}(\mathbf{y}, g(x)), \end{aligned}$$

since  $P(\mathbf{Y} = \mathbf{y} | Y = y, X = x) = 0$  for  $\mathbf{y}$  not containing  $y$ , then there holds

$$\bar{\mathcal{R}}(\bar{\mathcal{L}}, g(X)) = \mathcal{R}(\mathcal{L}, g(X)).$$

According to Lemma 1, by Assumption 1 and Assumption 3, there holds

$$\mathcal{L}(y, g(x)) = \sum_{\mathbf{y} \in \mathcal{Y}^y} \prod_{s \in \mathbf{y}, s \neq y} q_s \prod_{t \notin \mathbf{y}} (1 - q_t) \bar{\mathcal{L}}(\mathbf{y}, g(x)).$$

**Lemma 1** Let  $y$  be the true label of input  $x$ ,  $q_z := P(z \in \mathbf{y} | Y = y, X = x)$  for  $z \in \mathcal{Y}$ , and  $\mathcal{Y}^y := \{\mathbf{y} \in \mathcal{Y} | y \in \mathbf{y}\}$ . Then there holds

$$\sum_{\mathbf{y} \in \mathcal{Y}^y} \prod_{s \in \mathbf{y}, s \neq y} q_s \prod_{t \notin \mathbf{y}} (1 - q_t) = 1.$$

**Proof 3 (of Lemma 1)** By Assumption 1, we have

$$\begin{aligned} \sum_{\mathbf{y} \in \mathcal{Y}^y} \prod_{s \in \mathbf{y}, s \neq y} q_s \prod_{t \notin \mathbf{y}} (1 - q_t) &= \sum_{\mathbf{y} \in \mathcal{Y}^y} \prod_{s \in \mathbf{y}, s \neq y} 1 \cdot q_s \prod_{t \notin \mathbf{y}} (1 - q_t) \\ &= \sum_{\mathbf{y} \in \mathcal{Y}^y} \prod_{s \in \mathbf{y}, s \neq y} q_y \cdot q_s \prod_{t \notin \mathbf{y}} (1 - q_t) \\ &= \sum_{\mathbf{y} \in \mathcal{Y}^y} \prod_{s \in \mathbf{y}} q_s \prod_{t \notin \mathbf{y}} (1 - q_t) \\ &= \sum_{\mathbf{y} \in \mathcal{Y}^y} P(\mathbf{Y} = \mathbf{y} | Y = y, X = x) \\ &= 1, \end{aligned}$$

where the last equation holds since  $P(\mathbf{Y} = \mathbf{y} | Y = y, X = x) = 0$  for  $\mathbf{y} \notin \mathcal{Y}^y$ .

**Proof 4 (of Theorem 2)** According to Theorem 1, we have the form of the corresponding ordinary loss function being

$$\begin{aligned} \mathcal{L}_\psi(y, g(x)) &= \sum_{\mathbf{y} \in \mathcal{Y}^y} \prod_{s \in \mathbf{y}, s \neq y} q_s \prod_{t \notin \mathbf{y}} (1 - q_t) \bar{\mathcal{L}}_\psi(\mathbf{y}, g(x)) \\ &= \sum_{\mathbf{y} \in \mathcal{Y}^y} \prod_{s \in \mathbf{y}, s \neq y} q_s \prod_{t \notin \mathbf{y}} (1 - q_t) \sum_{z \in \mathbf{y}} w_z \psi(g_z(x)) \\ &\quad + \beta \cdot \sum_{\mathbf{y} \in \mathcal{Y}^y} \prod_{s \in \mathbf{y}, s \neq y} q_s \prod_{t \notin \mathbf{y}} (1 - q_t) \sum_{z \notin \mathbf{y}} w_z \psi(-g_z(x)). \end{aligned} \quad (1)$$

The first term on the right hand side of (1) is

$$\begin{aligned} &\sum_{\mathbf{y} \in \mathcal{Y}^y} \prod_{s \in \mathbf{y}, s \neq y} q_s \prod_{t \notin \mathbf{y}} (1 - q_t) \sum_{z \in \mathbf{y}} w_z \psi(g_z(x)) \\ &= \sum_{\mathbf{y} \in \mathcal{Y}^y} \prod_{s \in \mathbf{y}, s \neq y} q_s \prod_{t \notin \mathbf{y}} (1 - q_t) w_y \psi(g_y(x)) + \sum_{\mathbf{y} \in \mathcal{Y}^y} \prod_{s \in \mathbf{y}, s \neq y} q_s \prod_{t \notin \mathbf{y}} (1 - q_t) \sum_{z \in \mathbf{y} \setminus \{y\}} w_z \psi(g_z(x)) \\ &= \sum_{\mathbf{y} \in \mathcal{Y}^y} \prod_{s \in \mathbf{y}, s \neq y} q_s \prod_{t \notin \mathbf{y}} (1 - q_t) w_y \psi(g_y(x)) + \sum_{\mathbf{y} \in \mathcal{Y}^y} \sum_{z \in \mathbf{y} \setminus \{y\}} \prod_{s \in \mathbf{y}, s \neq y} q_s \prod_{t \in [K] \setminus \mathbf{y}} (1 - q_t) w_z \psi(g_z(x)). \end{aligned} \quad (2)$$

By Lemma 1, we have

$$\sum_{\mathbf{y} \in \mathcal{Y}^y} \prod_{s \in \mathbf{y}, s \neq y} q_s \prod_{t \notin \mathbf{y}} (1 - q_t) = 1,$$

and therefore the first term in (2) becomes

$$\sum_{\mathbf{y} \in \mathcal{Y}^y} \prod_{s \in \mathbf{y}, s \neq y} q_s \prod_{t \notin \mathbf{y}} (1 - q_t) w_y \psi(g_y(x)) = w_y \psi(g_y(x)). \quad (3)$$

For the second term in (2), since  $z \neq y$  and  $z \in \mathbf{y}$ , we switch the summations, and achieve

$$\begin{aligned} &\sum_{\mathbf{y} \in 2^{[K]}} \sum_{z \in \mathbf{y} \setminus \{y\}} \prod_{s \in \mathbf{y}, s \neq y} q_s \prod_{t \in [K] \setminus \mathbf{y}} (1 - q_t) w_z \psi(g_z(x)) \\ &= \sum_{z \neq y} \sum_{\mathbf{y} \in \mathcal{Y}^z \cap \mathcal{Y}^y} \prod_{s \in \mathbf{y}, s \neq y} q_s \prod_{t \in [K] \setminus \mathbf{y}} (1 - q_t) w_z \psi(g_z(x)) \end{aligned}$$

$$= \sum_{z \neq y} w_z \psi(g_z(x)) \sum_{\mathbf{y} \in \mathcal{Y}^z \setminus \mathcal{Y}^y} \prod_{s \in \mathbf{y}} q_s \prod_{t \in [K] \setminus \mathbf{y} \setminus \{y\}} (1 - q_t).$$

Without loss of generality, we assume  $y = K$  for notational simplicity, and write

$$\begin{aligned} & \sum_{z \neq y} w_z \psi(g_z(x)) \sum_{\mathbf{y} \in \mathcal{Y}^z \setminus \mathcal{Y}^y} \prod_{s \in \mathbf{y}} q_s \prod_{t \in [K] \setminus \mathbf{y} \setminus \{y\}} (1 - q_t) \\ &= \sum_{z \in [K-1]} w_z \psi(g_z(x)) \sum_{\mathbf{y} \in (2^{[K-1]})^z} \prod_{s \in \mathbf{y}} q_s \prod_{t \in [K-1] \setminus \mathbf{y}} (1 - q_t) \\ &= \sum_{z \in [K-1]} w_z \psi(g_z(x)) q_z \sum_{\mathbf{y} \in (2^{[K-1]})^z} \prod_{s \in \mathbf{y}, s \neq z} q_s \prod_{t \in [K-1] \setminus \mathbf{y}} (1 - q_t). \end{aligned}$$

Applying Lemma 1 with  $\mathcal{Y} = 2^{[K-1]}$ , we have

$$\sum_{\mathbf{y} \in (2^{[K-1]})^z} \prod_{s \in \mathbf{y}, s \neq z} q_s \prod_{t \in [K-1] \setminus \mathbf{y}} (1 - q_t) = 1, \quad (4)$$

and therefore the second term in (2) becomes

$$\sum_{\mathbf{y} \in 2^{[K]}} \sum_{z \in \mathbf{y} \setminus \{y\}} \prod_{s \in \mathbf{y}, s \neq y} q_s \prod_{t \in [K] \setminus \mathbf{y}} (1 - q_t) w_z \psi(g_z(x)) = \sum_{z \neq y} q_z w_z \psi(g_z(x)). \quad (5)$$

Similarly, by switching the summations, the second term on the right hand side of (1) becomes

$$\begin{aligned} & \beta \cdot \sum_{\mathbf{y} \in \mathcal{Y}^y} \prod_{s \in \mathbf{y}, s \neq y} q_s \prod_{t \notin \mathbf{y}} (1 - q_t) \sum_{z \notin \mathbf{y}} w_z \psi(-g_z(x)) \\ &= \beta \cdot \sum_{\mathbf{y} \in \mathcal{Y}^y} \sum_{z \notin \mathbf{y}} \prod_{s \in \mathbf{y}, s \neq y} q_s \prod_{t \notin \mathbf{y}} (1 - q_t) w_z \psi(-g_z(x)) \\ &= \beta \cdot \sum_{z \neq y} \sum_{\mathbf{y} \in \mathcal{Y}^y \cap \mathcal{Y}^z} \prod_{s \in \mathbf{y}, s \neq y} q_s \prod_{t \notin \mathbf{y}} (1 - q_t) w_z \psi(-g_z(x)) \\ &= \beta \cdot \sum_{z \neq y} \sum_{\mathbf{y} \in \mathcal{Y}^z \setminus \mathcal{Y}^y} \prod_{s \in \mathbf{y}} q_s \prod_{t \notin \mathbf{y}, t \neq y} (1 - q_t) w_z \psi(-g_z(x)) \\ &= \beta \cdot \sum_{z \neq y} \sum_{\mathbf{y} \in (2^{[K-1]})^z} \prod_{s \in \mathbf{y}} q_s \prod_{t \notin \mathbf{y}} (1 - q_t) w_z \psi(-g_z(x)) \\ &= \beta \cdot \sum_{z \neq y} q_z \sum_{\mathbf{y} \in (2^{[K-1]})^z} \prod_{s \in \mathbf{y}, s \neq z} q_s \prod_{t \notin \mathbf{y}} (1 - q_t) w_z \psi(-g_z(x)) \\ &= \beta \cdot \sum_{z \neq y} q_z w_z \psi(-g_z(x)), \end{aligned} \quad (6)$$

where the last equality holds according to (4).

By combining (3), (5), (6), we have

$$\begin{aligned} \mathcal{L}_\psi(y, g(x)) &= w_y \psi(g_y(x)) + \sum_{z \neq y} q_z w_z \psi(g_z(x)) + \beta \cdot \sum_{z \neq y} q_z w_z \psi(-g_z(x)) \\ &= w_y \psi(g_y(x)) + \sum_{z \neq y} q_z w_z [\psi(g_z(x)) + \beta \psi(-g_z(x))]. \end{aligned}$$

**Proof 5 (of Corollary 1)** When  $\beta = 0$ , we naturally have  $w_z = 0$  for  $z \in [K] \setminus \mathbf{y}$ , and thus there holds

$$\begin{aligned} \mathcal{L}_\psi(y, g(x)) &= w_y \psi(g_y(x)) + \sum_{z \neq y} w_z q_z \psi(g_z(x)) \\ &= w_y \psi(g_y(x)) + \sum_{z \in \mathbf{y}, z \neq y} w_z q_z \psi(g_z(x)). \end{aligned}$$

When  $\beta = 1$ , the result is obvious enough.

When  $\beta = 2$ , there holds

$$\begin{aligned}\mathcal{L}_\psi(y, g(x)) &= w_y \psi(g_y(x)) + \sum_{z \neq y} w_z q_z [\psi(g_z(x)) + 2\psi(-g_z(x))] \\ &= w_y \psi(g_y(x)) + \sum_{z \neq y} w_z q_z [\psi(g_z(x)) + \psi(-g_z(x))] + \sum_{z \neq y} w_z q_z \psi(-g_z(x)) \\ &= w_y \psi(g_y(x)) + \sum_{z \neq y} w_z q_z \psi(-g_z(x)) + \sum_{z \neq y} w_z q_z,\end{aligned}$$

where the last equation holds since  $\psi(\cdot)$  is symmetric.

## 2 SUPPLEMENTARY OF EXPERIMENTS

### 2.1 FOR SECTION 4.1

All models are trained for 500 epochs. The optimizer is stochastic gradient descent (SGD) with momentum 0.9, with the batch size chosen as 256. The learning rate decays by half every 50 epochs. For our method, the initial learning rate and weight decay is chosen by five-fold cross validation from the grid  $\{0.01, 0.02, 0.05, 0.1\}$  and  $\{1e-3, 1e-4, 1e-5, 1e-6\}$ .

### 2.2 FOR SECTION 4.3

One example of the data generation procedure in Section 4.3 is shown in the following probability matrix:

$$\begin{bmatrix} 1 & q_{adj} & q & q & \cdots & q & q_{adj} \\ q_{adj} & 1 & q_{adj} & q & \cdots & q & q \\ \vdots & \vdots & \vdots & \vdots & & \vdots & \vdots \\ q_{adj} & q & q & q & \cdots & q_{adj} & 1 \end{bmatrix}$$
